# Supplementary material for: Mechanism of Mepiquat Chloride Regulating Soybean Response to Drought Stress Revealed by Proteomics
Source: MDPI journal article supplement (doi:10.3390/plants12102037), 2023-05-19
Supplement: s1 [file s1]

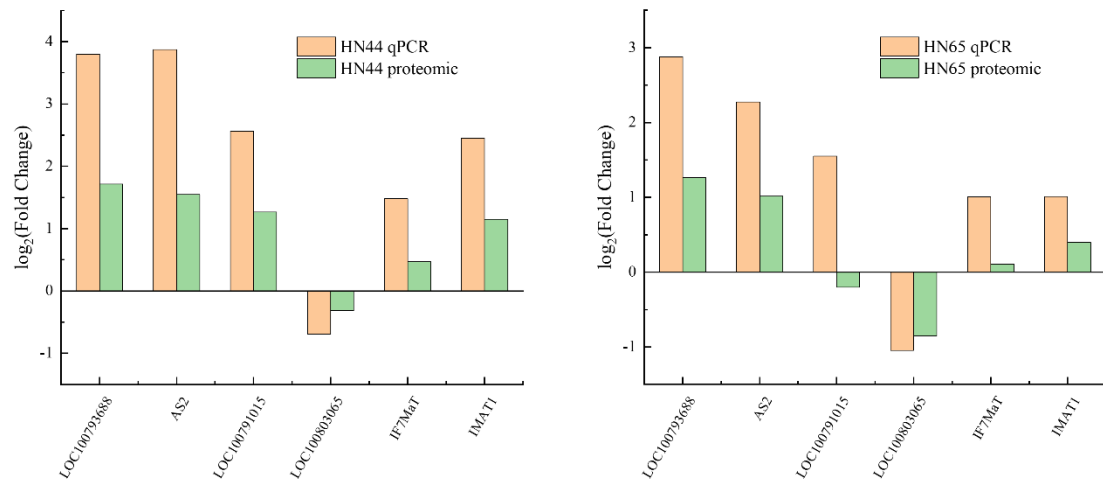

**Supplemental Figure S5.** The relative changes of genes and their encoded proteins in the two varieties, for each gene, bars represent the log<sub>2</sub> values of fold changes on MC treatment group (S100) compared to that on drought treatment (S0).
