# Supplementary material for: Mechanism of Mepiquat Chloride Regulating Soybean Response to Drought Stress Revealed by Proteomics
Source: MDPI journal article supplement (doi:10.3390/plants12102037), 2023-05-19
Supplement: s1 [file s1]

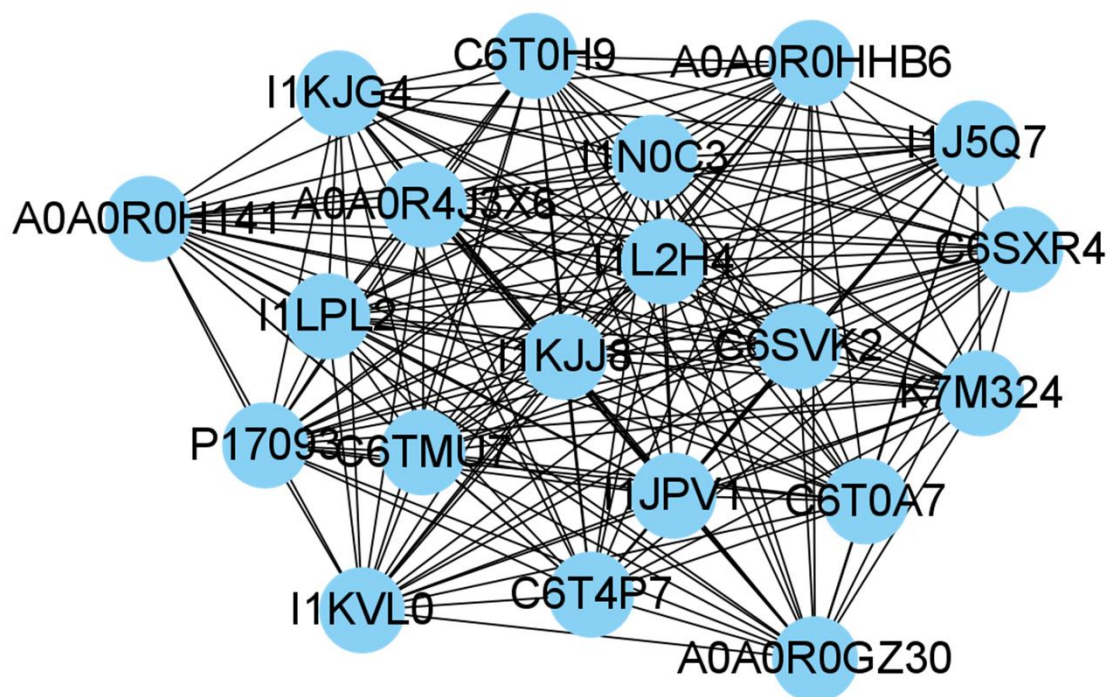

**Supplemental Figure S1.** Top 20 proteins predicted by the Cytohubba plugin in HN44.

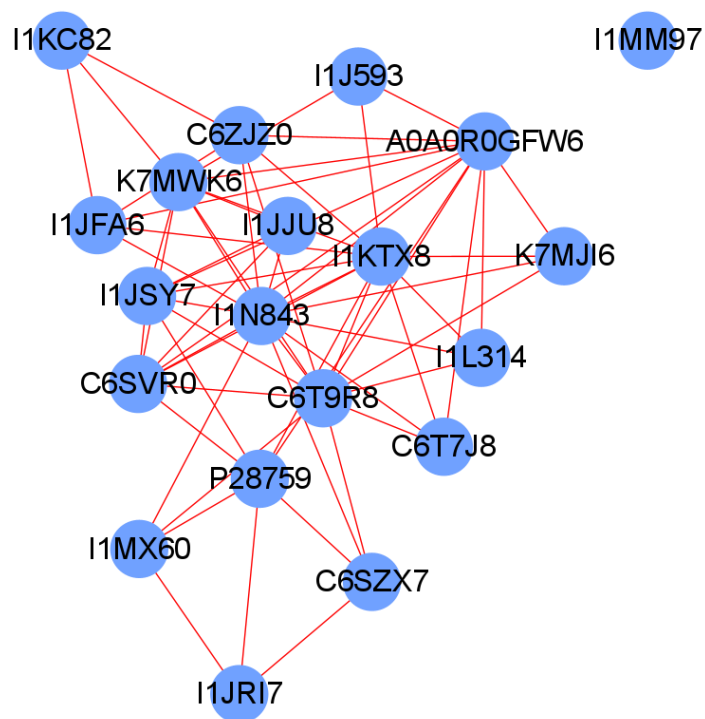

**Supplemental Figure S2.** Top 20 proteins predicted by the Cytohubba plugin in HN65.
