# Supplementary material for: Mechanism of Mepiquat Chloride Regulating Soybean Response to Drought Stress Revealed by Proteomics
Source: MDPI journal article supplement (doi:10.3390/plants12102037), 2023-05-19
Supplement: s1 [file s1]

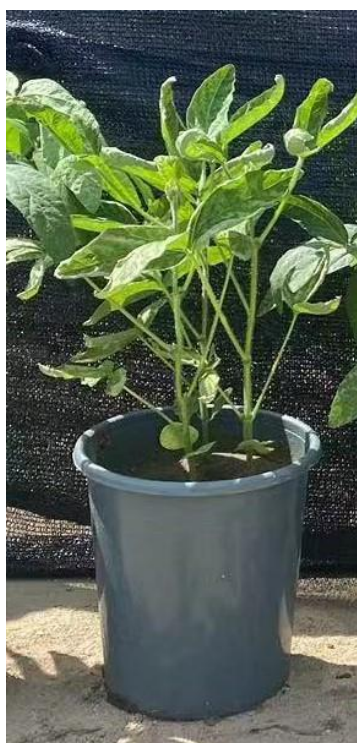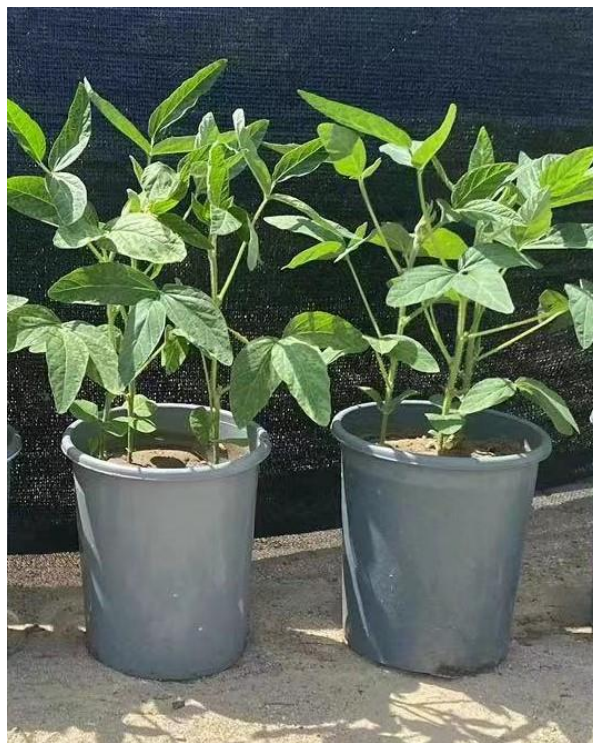

**Supplemental Figure S3.** The photos of HN65. (left) drought treatment. (Right) MC treatment.

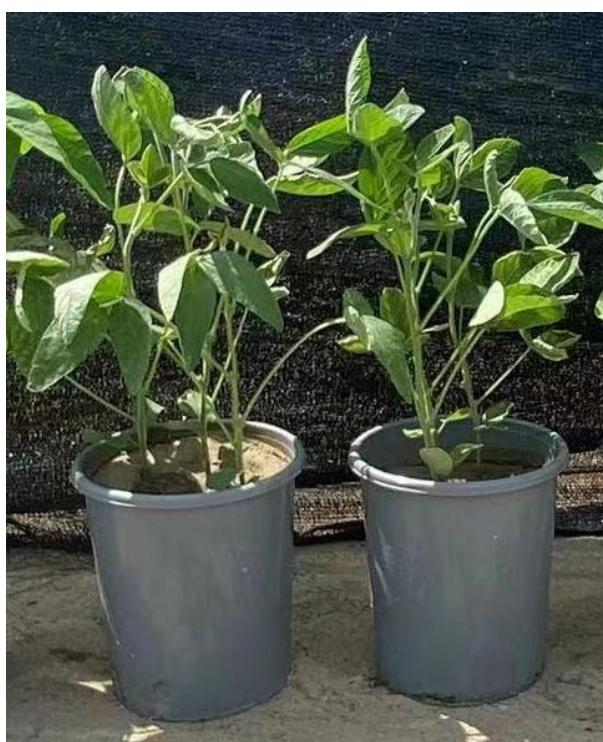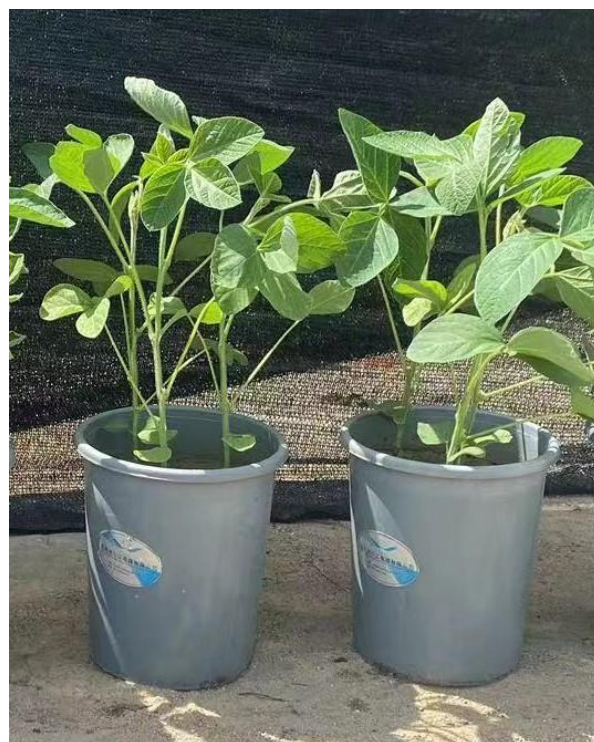

**Supplemental Figure S4.** The photos of HN44. (left) drought treatment. (Right) MC treatment.
