# Supplementary material for: Mechanism of Mepiquat Chloride Regulating Soybean Response to Drought Stress Revealed by Proteomics
Source: Plants (Basel). 2023 May 19;12(10):2037. doi: 10.3390/plants12102037 (PMC10222127; doi:10.3390/plants12102037)
Supplement: Supplementary file 1 [file plants-12-02037-s001.zip]

Archive with 4 entries (4 files):
- Supplementary Figure S5.pdf
- Supplementary Figures S1 and S2.pdf
- Supplementary Figures S3 and S4.pdf
- Supplementary Table S1.xlsx
