# Supplementary material for: Mechanism of Mepiquat Chloride Regulating Soybean Response to Drought Stress Revealed by Proteomics
Source: Plants (Basel). 2023 May 19;12(10):2037. doi: 10.3390/plants12102037 (PMC10222127; doi:10.3390/plants12102037)
Supplement: Supplementary file 1 [file plants-12-02037-s001.zip › Supplementary Table S1.xlsx]

## Sheet: Sheet1
Gene		sequence(5'-3')	product size
LOC100793688	F	CTTCGTGGATAATGGGAAGCC	107bp
	R	TAGGCTGCAAGTACACCACA
AS2	F	TGGGGGTTAGATGGCTCTGT	169bp
	R	AAGGGGCAGATGGAATAGCC
LOC100791015	F	GCTATGGCTATGGAAGTCGCA	188bp
	R	GCCCTTTTTGTTTGACCAAGTGT
LOC100803065	F	TCTCCCAAGGAAGCTTCTGC	128bp
	R	ACTTGCGCCTTGGCAGG
IF7MaT	F	CGTTGCTGTTTTCACTACCGA	200bp
	R	CGGTGTCAACTCAAACAATCCTTTA
IMAT1	F	GCCATCAAAGACCCAAGTGAG	125bp
	R	CTTGGAGGGAAAGGTAGGAGC
ACT11	F	CGGTGGTTCTATCTTGGCATC
	R	GTCTTTCGCTTCAATAACCCTA
